# Supplementary material
Source: PubMed Central journal article supplement (PMC8662132)
Supplement: JMV-94-253-s001.pdf [file JMV-94-253-s001.pdf]

## Supplemental Figures

### 1) Forest Plot of Pooled prevalence of Fatigue in Post COVID-19 patients.

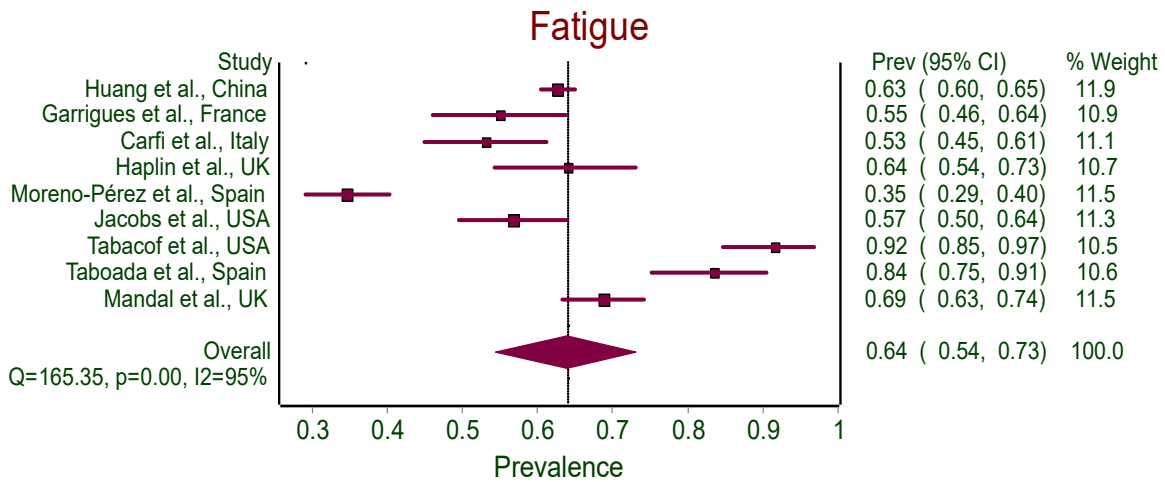

### 2) Forest Plot of Pooled prevalence of Dyspnea in Post COVID-19 patients.

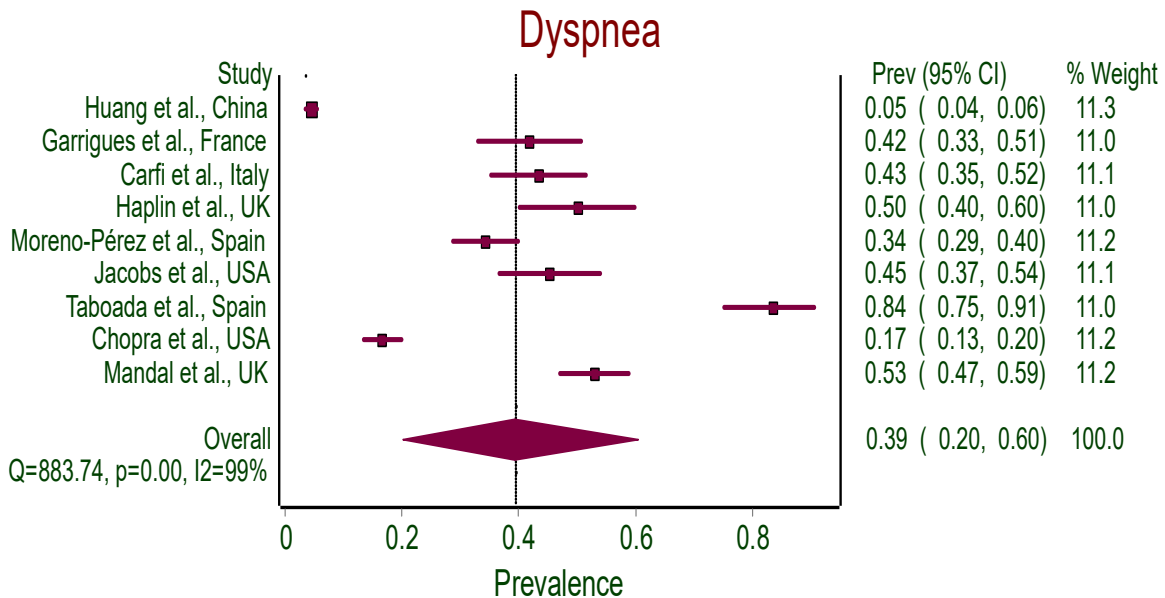

**3) Forest Plot of Pooled prevalence of Cough in Post COVID-19 patients.**

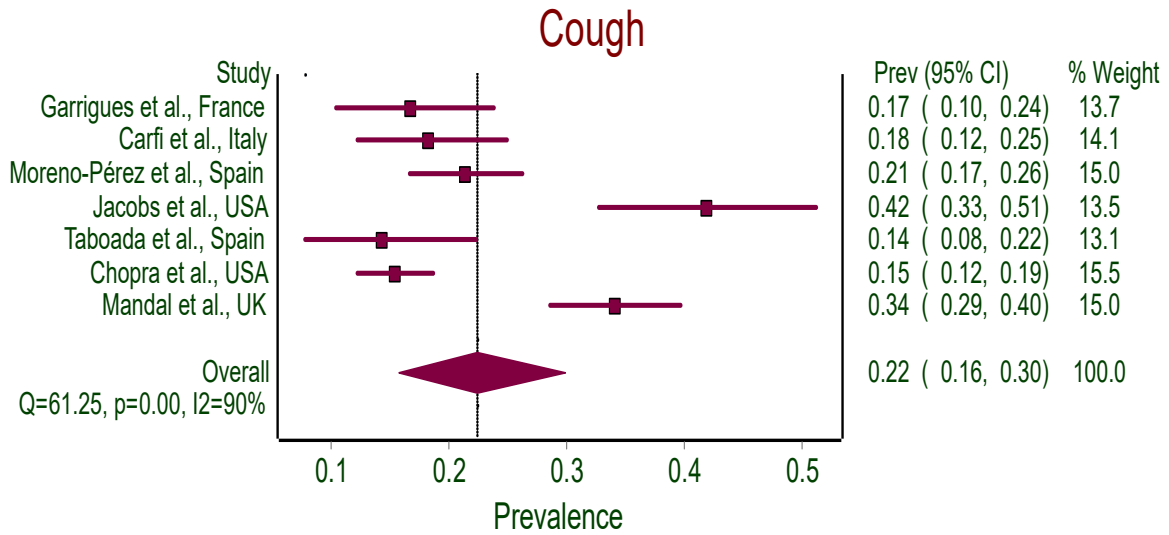

**4) Forest Plot of Pooled prevalence of Anosmia in Post COVID-19 patients.**

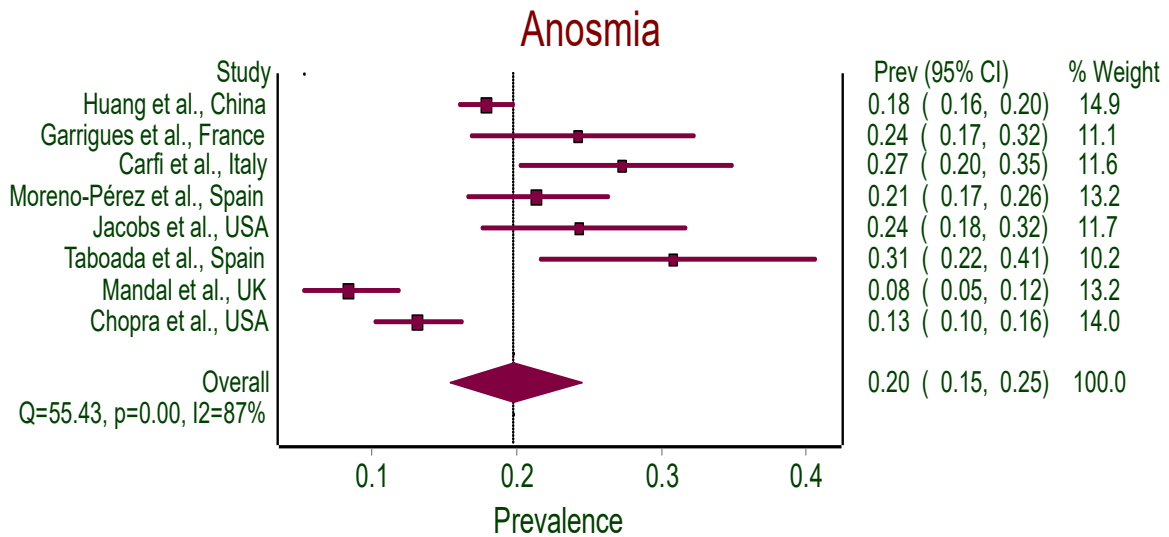

**5) Forest Plot of Pooled prevalence of Sleep Disturbances in Post COVID-19 patients.**

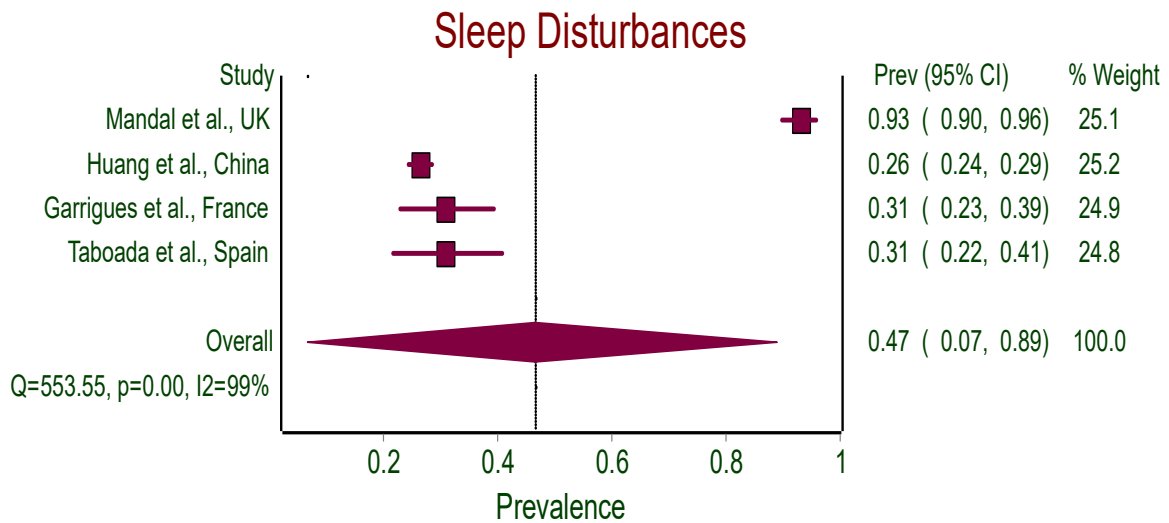

**6) Forest Plot of Pooled prevalence of Chest Pain in Post COVID-19 patients.**

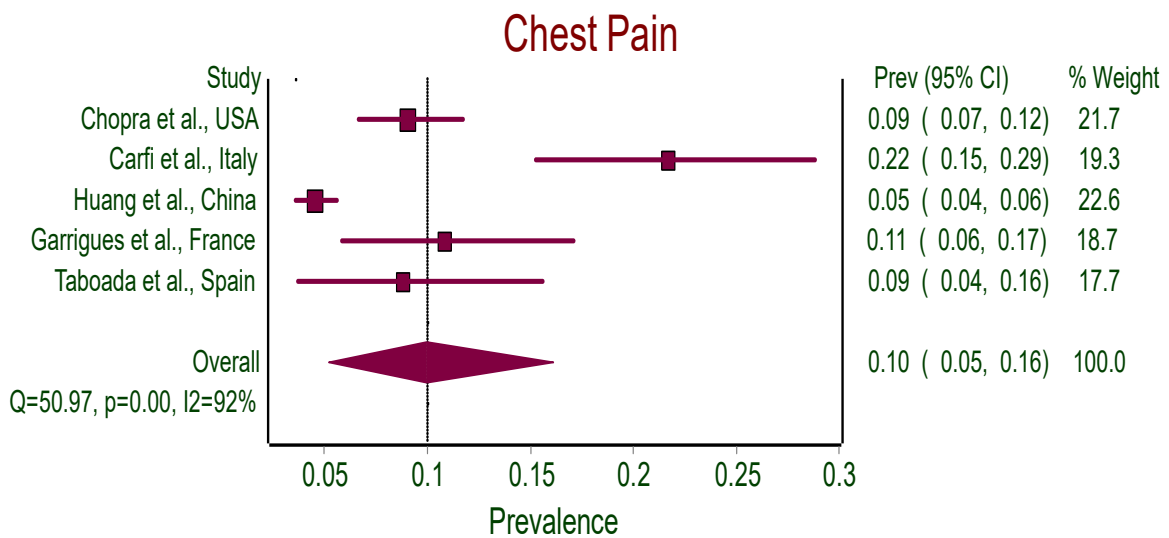

**7) Forest Plot of Pooled prevalence of Headache in Post COVID-19 patients.**

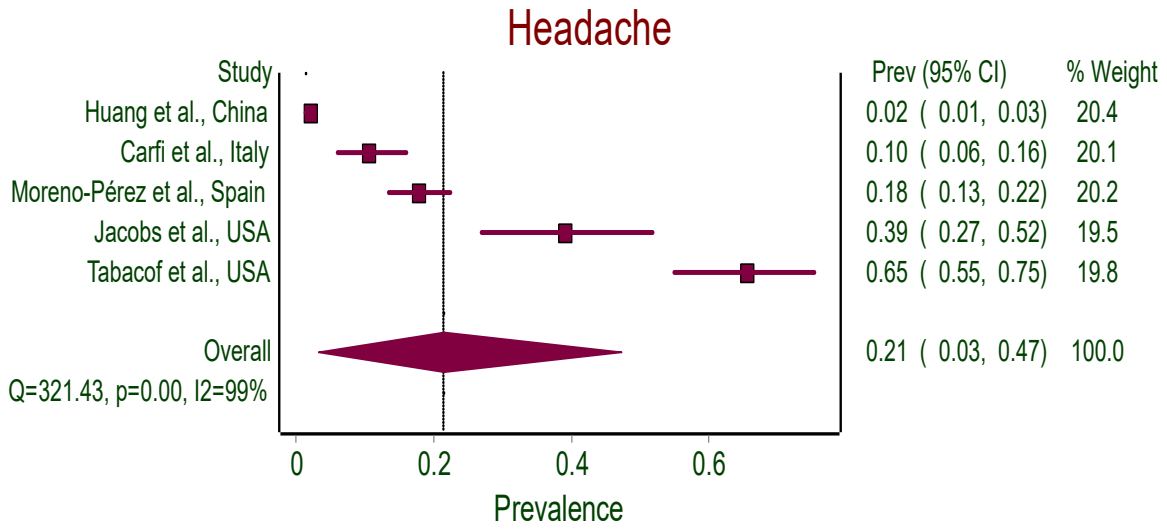

**8) Forest Plot of Pooled prevalence of Arthralgia in Post COVID-19 patients.**

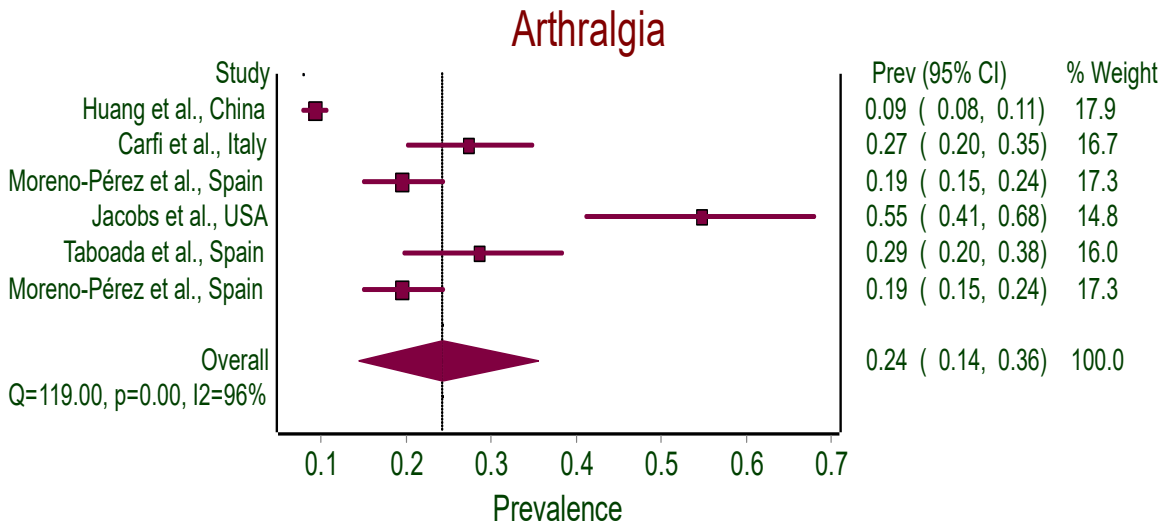

9) Forest Plot of Pooled prevalence of Mental health/PTSD in Post COVID-19 patients.

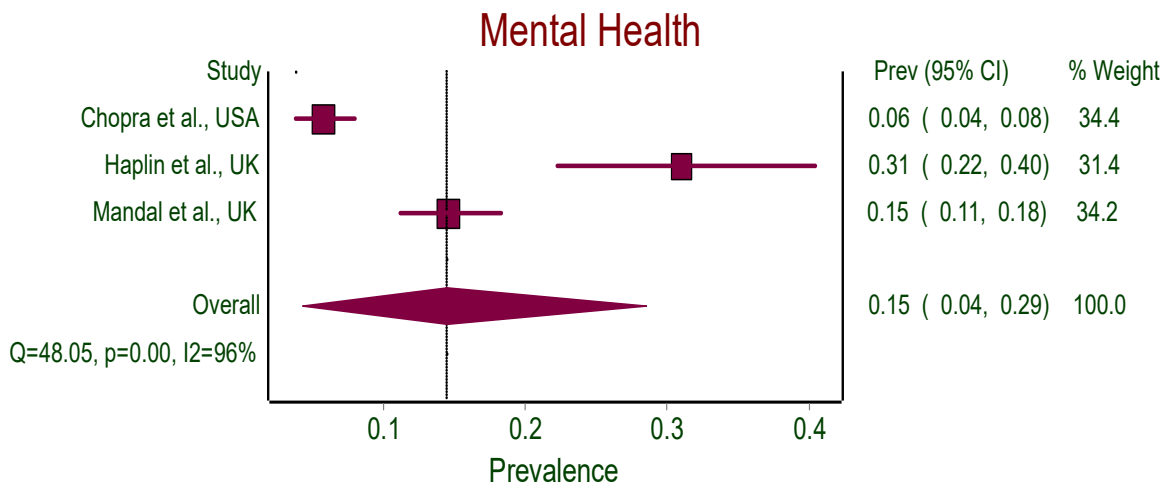

10) Meta-regression between poor quality of life (log-event) and anosmia in Post COVID-19 patients.

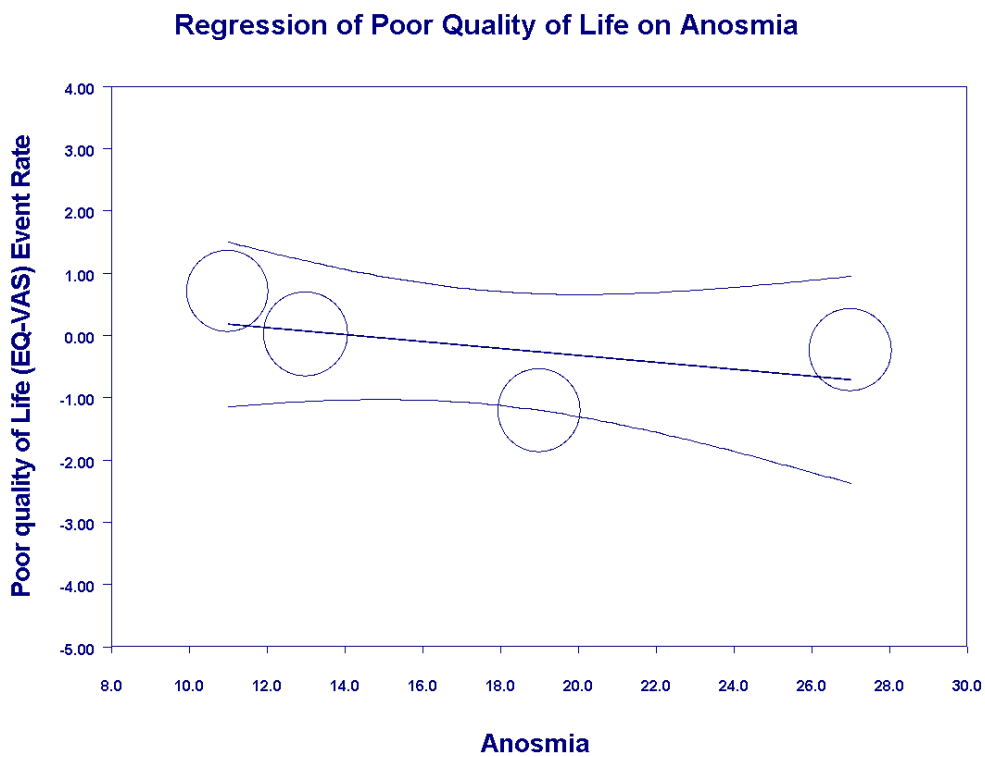

**11) Meta-regression between poor quality of life (log-event) and Dyspnea in Post COVID-19 patients.**

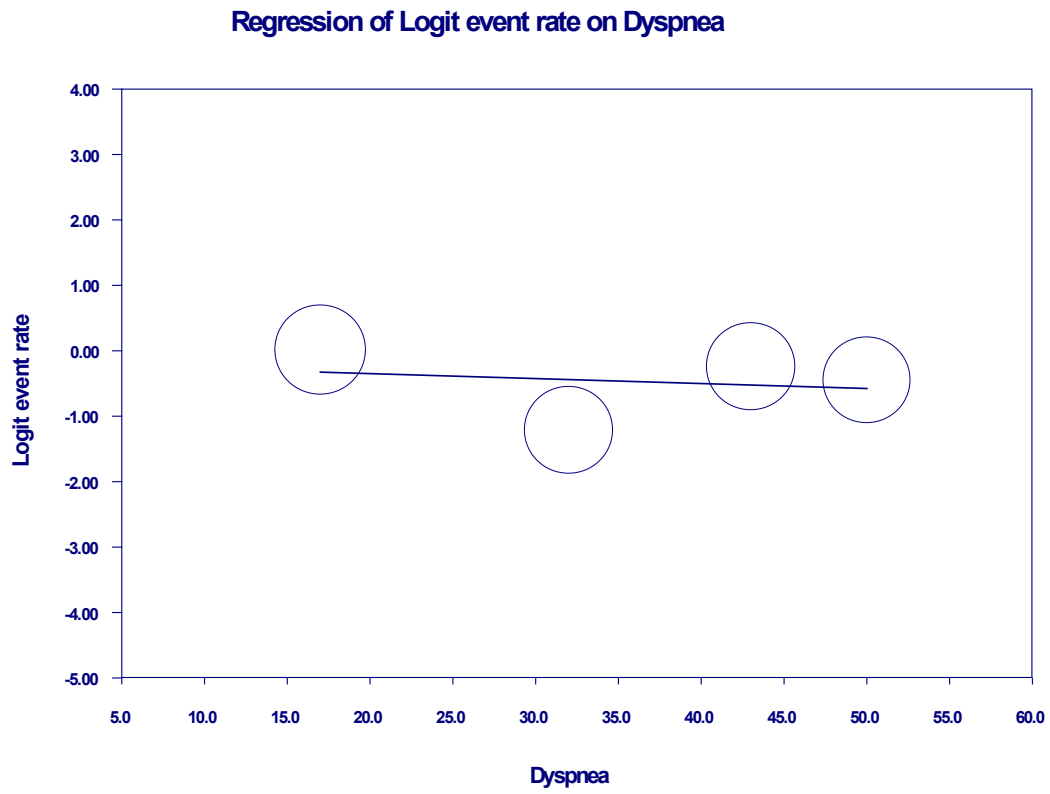

**Supplemental: Risk of bias of included studies**

| Author, Country            | Newcastle–Ottawa Scale |               |          | Overall risk of bias |
|----------------------------|------------------------|---------------|----------|----------------------|
|                            | Selection              | Comparability | Exposure |                      |
| Chopra et al., USA         | **                     | *             | *        | High                 |
| Carfi et al., Italy        | ***                    | *             | **       | Moderate             |
| Haplin et al., UK          | **                     | *             | *        | High                 |
| Taboada et al., Spain      | **                     | *             | *        | High                 |
| Jacobs et al., USA         | ***                    | *             | **       | Low                  |
| Tabacof et al., USA        | ***                    | *             | **       | Low                  |
| Valent et al., France      | ****                   | *             | *        | Moderate             |
| Arab-Zozani et al., Iran   | ****                   | *             | **       | Moderate             |
| Mandal et al., UK          | ***                    | *             | **       | Low                  |
| Huang et al., China        | ***                    | *             | **       | Moderate             |
| Garrigues et al., France   | **                     | *             | *        | High                 |
| Moreno-Pérez et al., Spain | ****                   | *             | **       | Moderate             |
